# Supplementary material for: Circulating Endocannabinoids and N-Acylethanolamines in Individuals with Cannabis Use Disorder—Preliminary Findings
Source: MDPI journal article supplement (doi:10.3390/brainsci13101375), 2023-09-27
Supplement: s1 [file s1]

## Supplementary

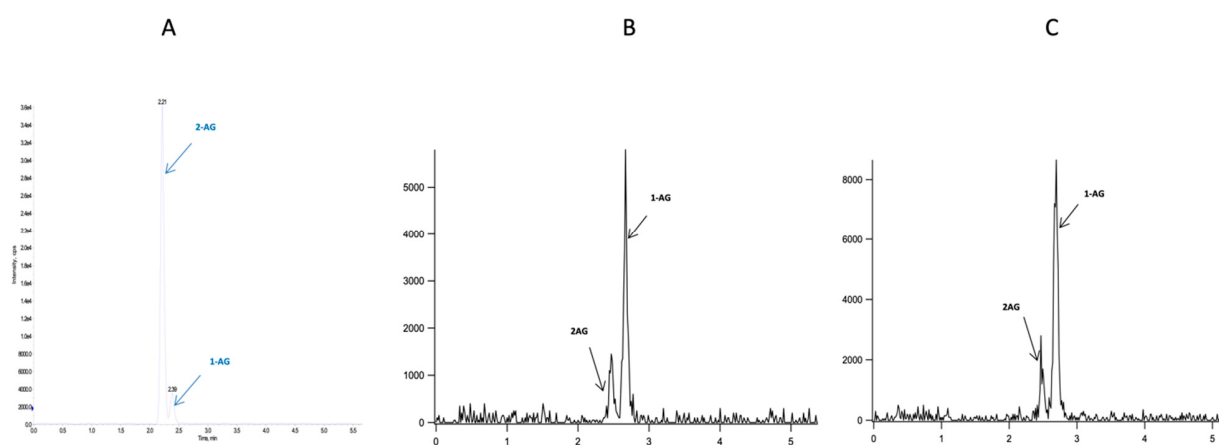

**Supplementary Figure S1.** Chromatograms of 2-AG in standards and samples. A 2-AG standard, freshly prepared, no extraction process, no storage period; B, 2-AG standard, had extraction process, stored in -80 °C before LC-MS analysis; C, 2-AG human plasma (e.g. ID FAAH082) had extraction process stored in -80 °C before LC-MS analysis

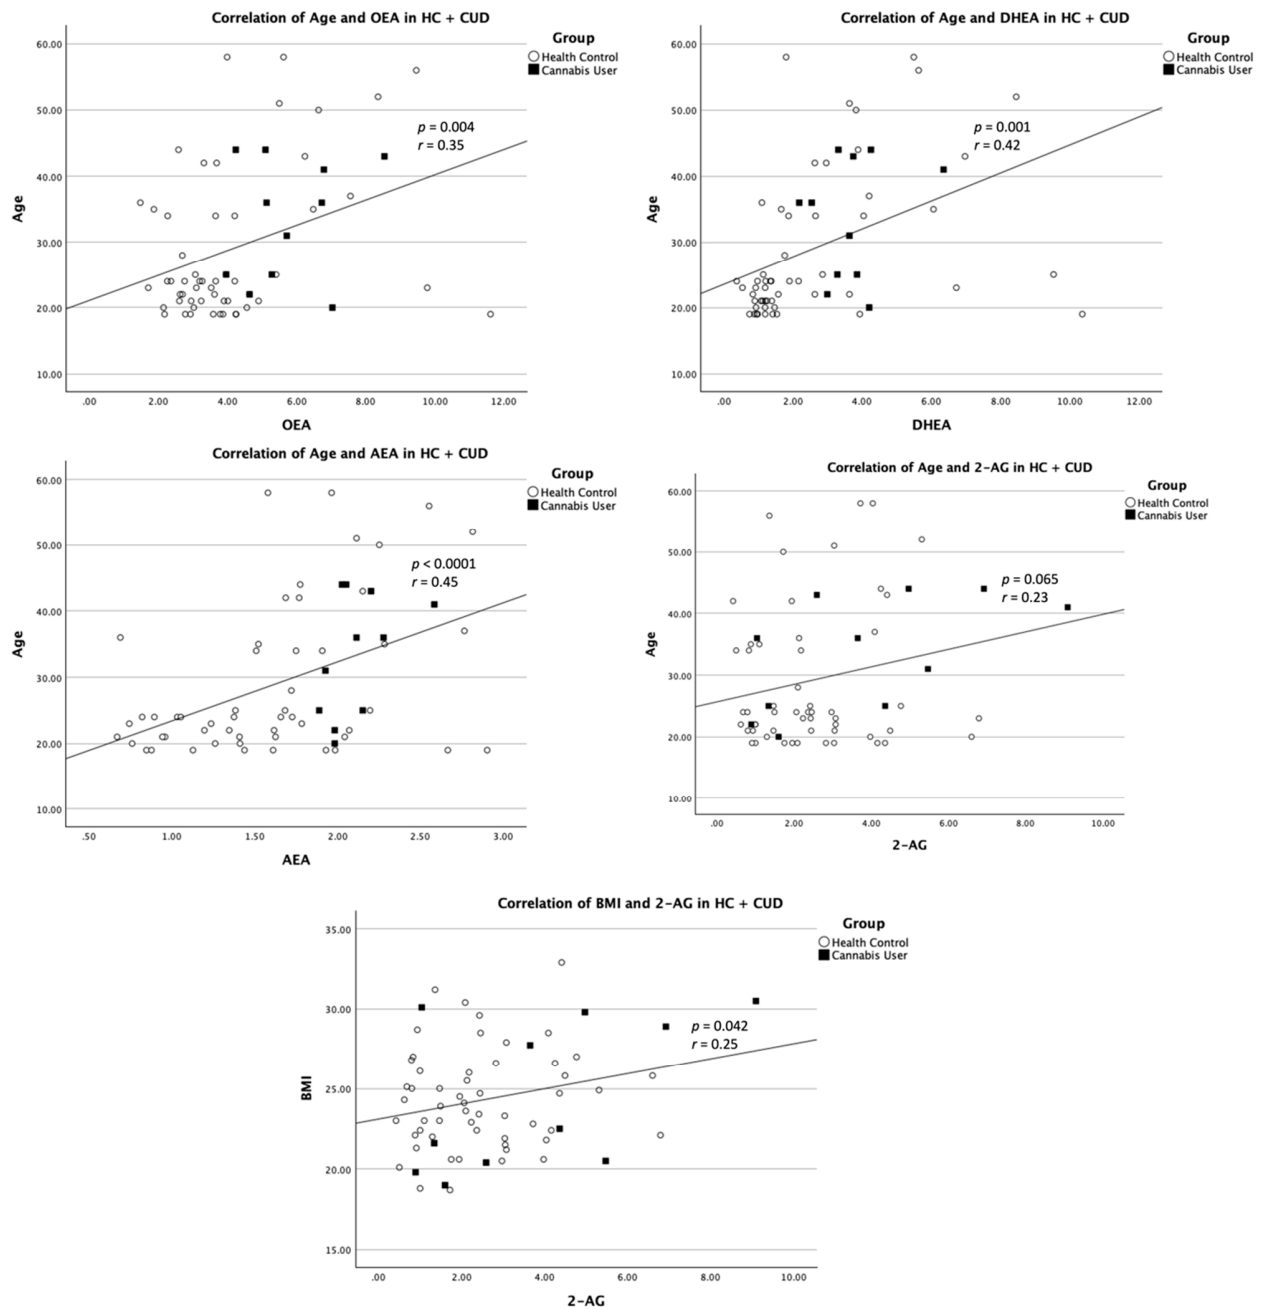

**Supplementary Figure S2.** Correlation of Body Mass Index (BMI, kg/m<sup>2</sup>) and Age with Peripheral Endocannabinoids and N-acylethanolamines. Age correlated with anandamide (AEA), N-docosahexaenoylethanolamine (DHEA) and N-oleoylethanolamine (OEA) and marginally with 2-arachidonoylglycerol (2-AG) the whole group Healthy Controls (HC: white square) and Cannabis Users (CU: black squares) combined and in Healthy Controls alone, but not in Cannabis Users alone. BMI only correlated with 2-arachidonoylglycerol (2-AG) in the whole group. BMI did not correlate with any other endocannabinoids and N-acylethanolamines in Cannabis Users, Healthy Controls or combined (whole group) ( $r < 0.02$ ;  $p > 0.8$ ). BMI did not correlate with 2-AG in each group alone ( $r < 0.5$ ;  $p > 0.1$ ).
